# Supplementary material for: Genomics and Pharmacogenomics Knowledge, Attitude and Practice of Pharmacists Working in United Arab Emirates: Findings from Focus Group Discussions—A Qualitative Study
Source: MDPI journal article supplement (doi:10.3390/jpm10030134), 2020-09-18
Supplement: s1 [file s1]

**Table S1:** Participant demographics.

|                                                | Number of pharmacists<br>participated= 38 |
|------------------------------------------------|-------------------------------------------|
| <b>Age :</b>                                   |                                           |
| <30 years old                                  | 10                                        |
| >31 years                                      | 28                                        |
| <b>Gender:</b>                                 |                                           |
| Male                                           | 14                                        |
| Female                                         | 24                                        |
| <b>Total years of experiences:</b>             |                                           |
| <4 years                                       | 6                                         |
| 5- 10 years                                    | 4                                         |
| > 11years                                      | 28                                        |
| <b>Studied Pharmacogenomics in college:</b>    |                                           |
| Yes                                            | 9                                         |
| No                                             | 29                                        |
| <b>Current position:</b>                       |                                           |
| Pharmacist (outpatient)                        | 7                                         |
| Pharmacist (inpatient)                         | 15                                        |
| Clinical Pharmacist                            | 6                                         |
| Pharmacy supervisor                            | 5                                         |
| Resident                                       | 4                                         |
| Community pharmacist                           | 1                                         |
| <b>Type of facility:</b>                       |                                           |
| Tertiary care Hospital                         | 34                                        |
| Secondary care Hospital                        | 0                                         |
| Health clinic                                  | 3                                         |
| Other                                          | 1                                         |
| <b>Facility operated by:</b>                   |                                           |
| Government.                                    | 35                                        |
| Non-Government                                 | 3                                         |
| <b>Nationality:</b>                            |                                           |
| Locals                                         | 7                                         |
| Non-locals                                     | 31                                        |
| <b>Qualification:*</b>                         |                                           |
| BSc                                            | 18                                        |
| Master                                         | 9                                         |
| Pharm.D                                        | 8                                         |
| Board Certified                                | 12                                        |
| <b>Practiced outside United Arab Emirates:</b> |                                           |
| Yes                                            | 23                                        |
| No                                             | 15                                        |
| Number of declined participation               | 43                                        |

\*Sum exceeds 100% as participants can pick more than one choice.

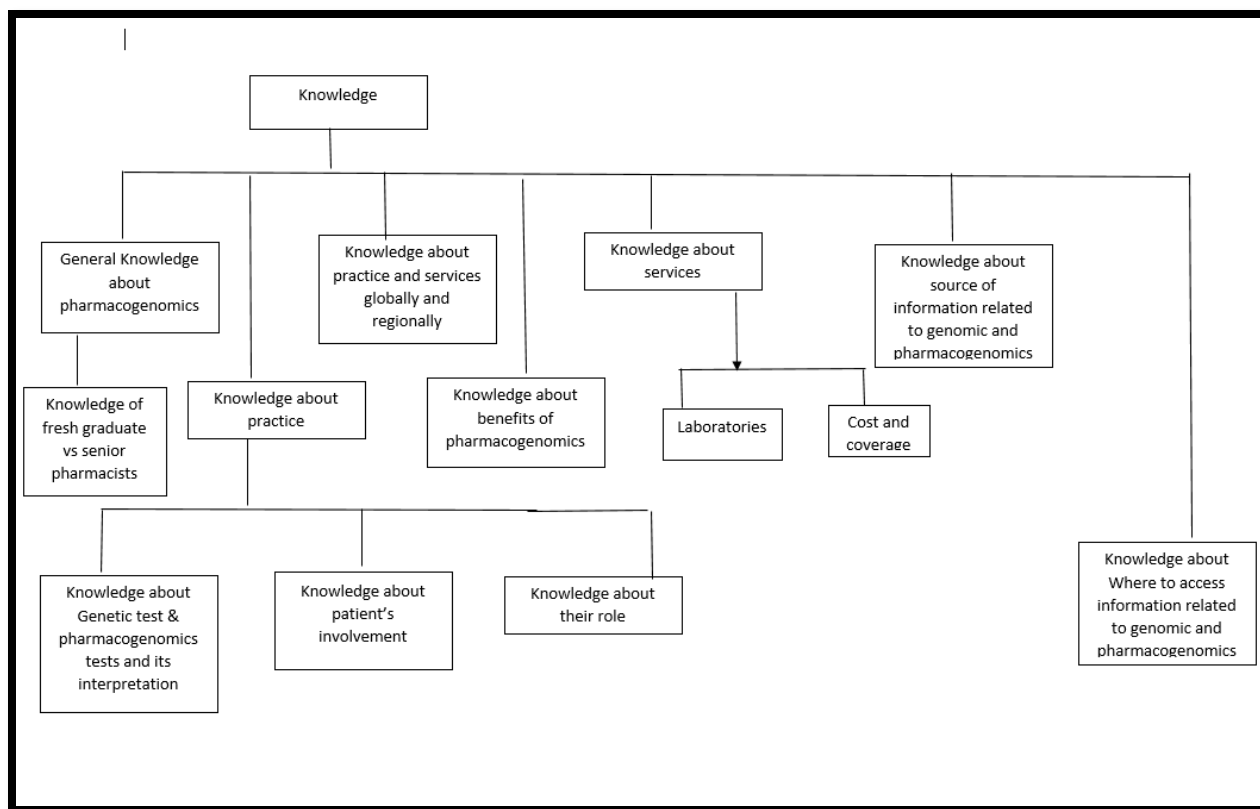

Figure S1. Main themes and subthemes of the knowledge of the pharmacists in United Arab Emirates toward genomic medicine and pharmacogenomics

### PHARMACIST'S RATING OF THEIR CURRENT UNDERSTANDING OF PHARMACOGENOMICS

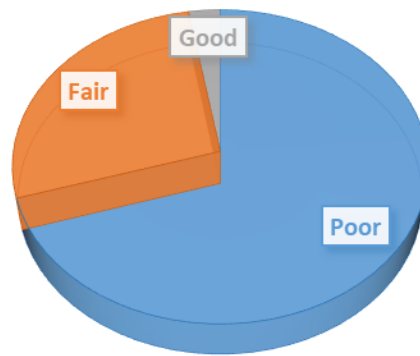

Figure S2. The rating of the perceived knowledge of the pharmacists in United Arab Emirates toward pharmacogenomics

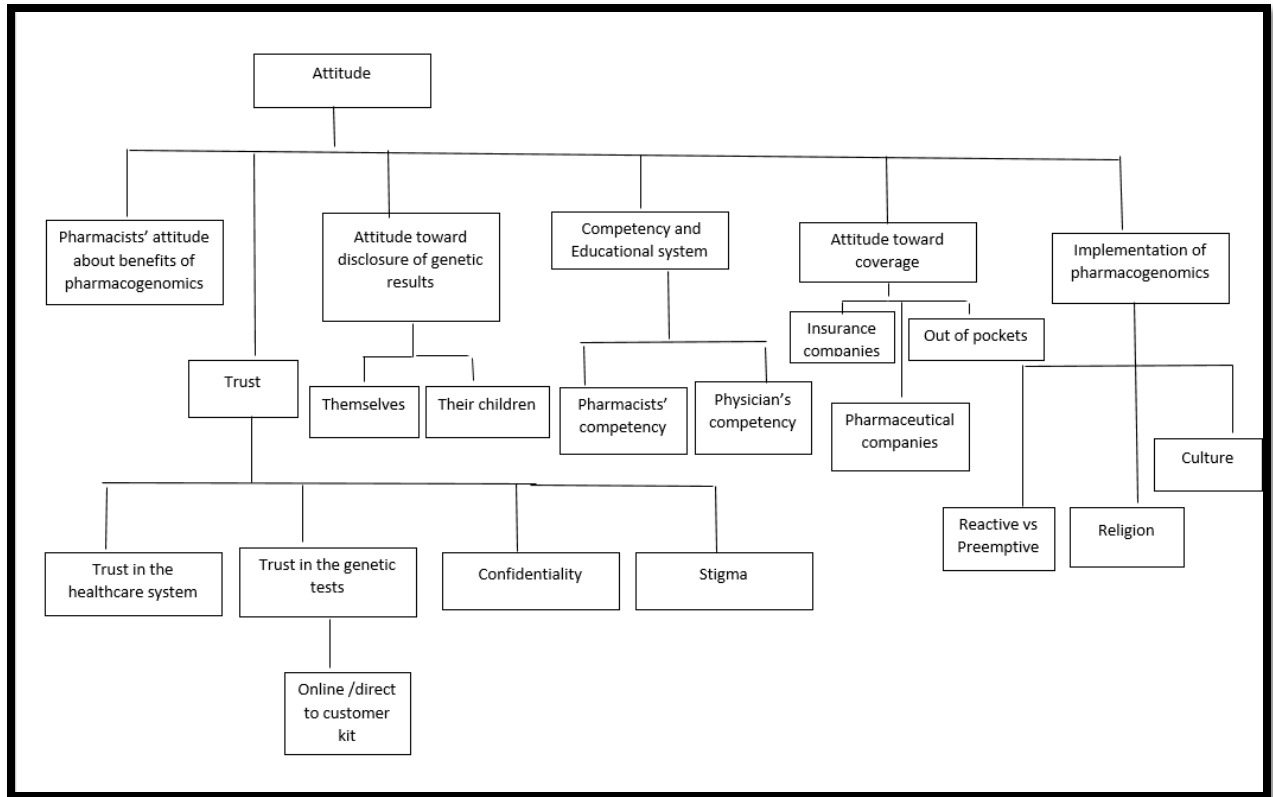

Figure S3. Main themes and subthemes of the attitude of the pharmacists in United Arab Emirates toward genomic medicine and pharmacogenomics
